# Supplementary material for: Virological and Parasitological Characterization of Mini-LEWE Minipigs Using Improved Screening Methods and an Overview of Data on Various Minipig Breeds
Source: MDPI journal article supplement (doi:10.3390/microorganisms9122617), 2021-12-18
Supplement: s1 [file s1]

## Supplementary materials

**Table S1** gBlock gene fragments used in this study

| <b>gBlock No.</b> | <b>Gene of interest</b> | <b>sequence length</b> | <b>DNA content (in ng/ <math>\mu</math>l)</b> | <b>copy No. of stock solution</b> |
|-------------------|-------------------------|------------------------|-----------------------------------------------|-----------------------------------|
| I                 | PPV-1                   | 499 bp                 | 1,69                                          | $3,3 \times 10^9$ copies/ $\mu$ l |
|                   | PCMV                    |                        |                                               |                                   |
|                   | PLHV-3                  |                        |                                               |                                   |
|                   | HEV                     |                        |                                               |                                   |
|                   | PCV3                    |                        |                                               |                                   |
| II                | PLHV-1                  | 653 bp                 | 2,62                                          | $3,9 \times 10^9$ copies/ $\mu$ l |
|                   | PLHV-2                  |                        |                                               |                                   |
|                   | PCV4                    |                        |                                               |                                   |
|                   | SARS-CoV-2              |                        |                                               |                                   |
|                   | TTSuV-1                 |                        |                                               |                                   |
| III               | TTSuV-2                 | 690 bp                 | 1,13                                          | $1,6 \times 10^9$ copies/ $\mu$ l |
|                   | pGAPDH                  |                        |                                               |                                   |
|                   | huGAPDH                 |                        |                                               |                                   |
|                   | PERVpol                 |                        |                                               |                                   |
|                   | PCV2                    |                        |                                               |                                   |
| V                 | PCV1                    | 623 bp                 | 4,72                                          | $7,4 \times 10^9$ copies/ $\mu$ l |
|                   | PCV2                    |                        |                                               |                                   |
|                   | PCV3                    |                        |                                               |                                   |
|                   | PCV4                    |                        |                                               |                                   |
|                   | PLHV-3                  |                        |                                               |                                   |

**Table S2:** Experimental details concerning quality control criteria when applying a log<sub>10</sub> dilutional series of the gBlock in the respective qPCR approaches

| PCR assay | reference | internal control | PCR efficiency <sup>1</sup> |
|-----------|-----------|------------------|-----------------------------|
| HEV       | [4]       | Flu (NA)         | 0.90                        |
| PCMV      | [2]       | pGAPDH           | 1.07                        |
| PLHV-1    | [3]       | pGAPDH           | 1.01                        |
| PLHV-2    | [3]       | pGAPDH           | 1.01                        |
| PLHV-3    | [13]      | pGAPDH           | 1.00                        |
| PCV1      | [12]      | pGAPDH           | 0.90                        |
| PCV2      | [12]      | pGAPDH           | 1.09                        |
| PCV3      | [12]      | pGAPDH           | 0.95                        |
| PCV4      | [12]      | pGAPDH           | 0.85                        |
| PPV-1     | [1]       | pGAPDH           | 0.94                        |
| PERV pol  | [11]      | pGAPDH           | 0.95                        |

<sup>1</sup>PCR efficiency curve was calculated with the qPCRsoft software from Analytik Jena (Jena, Germany) and the PCR efficiency was determined as the slope R<sup>2</sup>

**Table S3** Virus-specific oligosequences integrated in gBlocks I, II, III and IV

| GOI*             | reference | Oligosequence of the amplicon (5' → 3')                                                                                                        |
|------------------|-----------|------------------------------------------------------------------------------------------------------------------------------------------------|
| <b>gBlock I</b>  |           |                                                                                                                                                |
| PPV-1            | [1]       | CAGAATCAGCAACCTCACCACCAACCAAAATATATAATAATGATCTAACT<br>GCAAGCTTAATGGTCGCACTAGACACCAATAACACACTTCCATACACACC<br>AGCAGC                             |
| PCMV             | [2]       | ACTTCGTGCGAGCTCATCTGAGAGAGCTCGACCGCCGCCCTGGCAACCTC<br>GGAATCCCAGAAC                                                                            |
| PLHV-3           | [3]       | AAGGACCCCAAAGAGGAAAATCAATTTTATGGTTCACCTTCTACCTTTCC<br>TTACAGAGTATGCAGTGCCTCAG                                                                  |
| HEV              | [4]       | GGTGGTTTCTGGGGTGACCGGGCTGATTCTCAGCCCTTCGCAATCCCCTA<br>TATTCATCCAACCAACCCCT                                                                     |
| PCV3             | [5]       | AGTGCTCCCCATTGAACGGTGGGGTCATATGTGTTGAGCCATGGGGTGG<br>GTCTGGAGAAAAAGAAGAGGCTTTGTCCTGGGTGAGCGCTGGTAGTTCCC<br>GCCAGAAGTGTTTGGGGGTGAAGTAACGGCTGTGT |
| <b>gBlock II</b> |           |                                                                                                                                                |
| PLHV-1           | [3]       | CTCACCTCAAATACAGCGACCTGGTCTACTGAATCGCCGCTAACAGGTC<br>ACTATGGAACACACGATTCAAGC                                                                   |
| PLHV-2           | [3]       | GTCACCTGCAAATACACAGGCCTGGTCTACTGAAGCGCTGCCAATAGGTC<br>AATATGGAACATACGATTCAAGCC                                                                 |
| PCV4             | [6]       | CAGCGACCTTAAAGCGGCTGTGGCCGCCCTGAATGCCGGCAGCTCAATGA<br>GTGAAGTGGCCCGTGAGTTCCCGTCTGTATTTATAAGGTATGGGCGTGGC<br>CTCCGGGACTACGTCATTACTGC            |
| SARS-CoV-2       | [7]       | ACAGGTACGTTAATAGTTAATAGCGTACTTCTTTTCTTGCTTTCGTGGT<br>ATTCTTGCTAGTTACACTAGCCATCCTTACTGCGCTTCGATTGTGTGCGT<br>ACTGCTGCAATAT                       |

|                   |      |                                                                                                                                                                                                                                                             |
|-------------------|------|-------------------------------------------------------------------------------------------------------------------------------------------------------------------------------------------------------------------------------------------------------------|
| TTSuV-1           | [8]  | CGAATGGCTGAGTTTATGCCGCCAGCGGTAGACAGAACTGTCTAGCGAC<br>TGGGCGGGTGCCGGAGGATCCCTGATCCGGAGTCAAGGGGCCTATC                                                                                                                                                         |
| TTSuV-2           | [8]  | CGAATGGCTGAGTTTATGCCGCTGGTGGTAGACACGAACAGAGCTGAGT<br>GTCTAACCGCCTGGGCGGGTGCCGGAGCTCCTGAGAGCGGAGTCAAGGG<br>GCTTATC                                                                                                                                           |
| <b>gBlock III</b> |      |                                                                                                                                                                                                                                                             |
| pGAPDH            | [9]  | ACATGGCCTCCAAGGAGTAAGAGCCCCTGGACCACCAACCCCAGCAAGAG<br>CACGCGAGGAGGAGAGAGGCCCTCAGCTGCTGGGGAGTCACAGCCCCAAC<br>TCGATC                                                                                                                                          |
| huGAPDH           | [10] | GGCGATGCTGGCGCTGAGTACGTCGTGGAGTCCACTGGCGTCTTCACCAC<br>CATGGAGAAGGCTGGGGCTCATTTGCAGGGGGGAGCCAAAAGGGTCATCA<br>TCTCTGCCCCCTCTGCTGATGCCCCATGTTCTGTCATGGGTGTGGACCA                                                                                               |
| PERV pol          | [11] | CGACTGCCCCAAGGGTTCAAGAACTCCCCGACCATCTTTGACGAAGCCCT<br>ACACAGGGACCTGGCCAACTTCAGGATCCAACACCCTCAGGTGACCCTCC<br>TCCAGTACGTGGATGACCTGCTTCTGGCGGGAGCCACCAAACAGGACTGC<br>TTAGAAGGTACGAAGGCACTACTGCTGGAATTGTCTGACCTAGGCTACAG<br>AGCCTCTGCTAAGAAGGCCAGATTTGCAGGAGAGA |
| PCV2              | [12] | CGGATATTGTATTCTGGTCGTATATACTGTTTTCGAACGCAGTGCCTAG<br>GCCTACGTGGTCTACATTTCCAGCAGTTTGTAGTCTCAGCCATAGCTGAT<br>TTCTTTTGTGTTTGGTTGGAAGTAATCAATAGTGGAATCTAGGACAGG                                                                                                 |

**Table S2** (Continuation)

| <b>GOI</b>       | <b>reference</b> | <b>Oligosequence of the amplicon (5' → 3')</b>                                                                                                            |
|------------------|------------------|-----------------------------------------------------------------------------------------------------------------------------------------------------------|
| <b>gBlock IV</b> |                  |                                                                                                                                                           |
| PCV1             | [12]             | AACCCCATAGAGGTGGGTGTTACCCCTTAATAATCCTTCCGAGGAGGAG<br>AAAAACAAAATACGGGAGCTTCCAATCTCCCTTTTGATTATTTGTTTG<br>CGGAGAGGAAGGTTTGAAGAGGGTAGAA                     |
| PCV2             | [12]             | CTGAGTCTTTTTATCACTTCGTAATGGTTTTTATTATTCACTTAGGGTT<br>AAGTGGGGGGTCTTTAAGATTAAATTCTCTGAATTGTACATACATGGTTA<br>TACGGATATTGTAATCCTGGTCGTATATACTGTTTTCGAACGCAGT |
| PCV3             | [12]             | CATAAATGCTCCAAAGCAGTGCTCCCCATTGAACGGTGGGGTCATATGTG<br>TTGAGCCATGGGGTGGGTCTGGAGAAAAAGAAGAGGCTTTGTCCTGGGTGA                                                 |
| PCV4             | [12]             | ATTATTAAACAGACTTTATTTGTGTCATCACTTCGGATACTACACTTGAT<br>CTTAGCCAAAAGGCTCGTTGATTGAGTGATCACTACGCATTATCCCTGT                                                   |
| PLHV-3           | [13]             | AACAGCGCCAGAAAAAAGGACCCCAAAGAGGAAAATCAATTTTATGGTT<br>CACCTTCTACCTTTCC                                                                                     |

\*GOI = gene of interest

**Figure S1** Workflow of using gBlock gene fragments as standard for the determination of the copy number using gBlock I as example

**(1) Determination of the genes of interest**

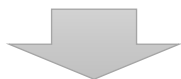

**(2) Design of a gBlock**

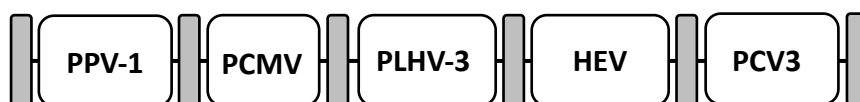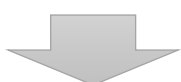

**(3) Calculation of the copy number**

$$\text{copy number per } \mu\text{l} = c \times M \times 1 \times 10^{-15} \frac{\text{mol}}{\text{fmol}} \times \text{Avogadro's number}$$

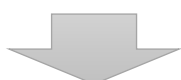

**(4) Preparation of a log<sub>10</sub> dilutional series**

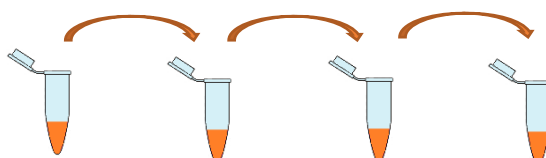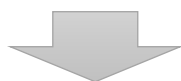

**(5) Comparative analysis of the qPCR assays using the log<sub>10</sub> dilutional series of the gBlock**

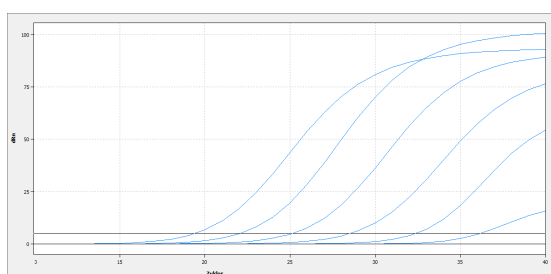

1. Opriessnig, T.; Shen, H.G.; Pal, N.; Ramamoorthy, S.; Huang, Y.W.; Lager, K.M.; Beach, N.M.; Halbur, P.G.; Meng, X.J. A live-attenuated chimeric porcine circovirus type 2 (PCV2) vaccine is transmitted to contact pigs but is not upregulated by concurrent infection with porcine parvovirus (PPV) and porcine reproductive and respiratory syndrome virus (PRRSV) and is efficacious in a PCV2b-PRRSV-PPV challenge model. *Clin Vaccine Immunol* **2011**, *18*, 1261-1268, doi:10.1128/CVI.05057-11.
2. Mueller, N.J.; Barth, R.N.; Yamamoto, S.; Kitamura, H.; Patience, C.; Yamada, K.; Cooper, D.K.; Sachs, D.H.; Kaur, A.; Fishman, J.A. Activation of cytomegalovirus in pig-to-primate organ xenotransplantation. *J Virol* **2002**, *76*, 4734-4740, doi:10.1128/jvi.76.10.4734-4740.2002.
3. Chmielewicz, B.; Goltz, M.; Franz, T.; Bauer, C.; Brema, S.; Ellerbrok, H.; Beckmann, S.; Rziha, H.J.; Lahrmann, K.H.; Romero, C., et al. A novel porcine gammaherpesvirus. *Virology* **2003**, *308*, 317-329, doi:10.1016/s0042-6822(03)00006-0.
4. Jothikumar, N.; Cromeans, T.L.; Robertson, B.H.; Meng, X.J.; Hill, V.R. A broadly reactive one-step real-time RT-PCR assay for rapid and sensitive detection of hepatitis E virus. *J Virol Methods* **2006**, *131*, 65-71, doi:10.1016/j.jviromet.2005.07.004.
5. Palinski, R.; Pineyro, P.; Shang, P.; Yuan, F.; Guo, R.; Fang, Y.; Byers, E.; Hause, B.M. A Novel Porcine Circovirus Distantly Related to Known Circoviruses Is Associated with Porcine Dermatitis and Nephropathy Syndrome and Reproductive Failure. *J Virol* **2017**, *91*, doi:10.1128/JVI.01879-16.
6. Zhang, H.H.; Hu, W.Q.; Li, J.Y.; Liu, T.N.; Zhou, J.Y.; Opriessnig, T.; Xiao, C.T. Novel circovirus species identified in farmed pigs designated as Porcine circovirus 4, Hunan province, China. *Transbound Emerg Dis* **2020**, *67*, 1057-1061, doi:10.1111/tbed.13446.
7. Corman, V.M.; Landt, O.; Kaiser, M.; Molenkamp, R.; Meijer, A.; Chu, D.K.; Bleicker, T.; Brunink, S.; Schneider, J.; Schmidt, M.L., et al. Detection of 2019 novel coronavirus (2019-nCoV) by real-time RT-PCR. *Euro Surveill* **2020**, *25*, doi:10.2807/1560-7917.ES.2020.25.3.2000045.
8. Xiao, C.T.; Gimenez-Lirola, L.; Huang, Y.W.; Meng, X.J.; Halbur, P.G.; Opriessnig, T. The prevalence of Torque teno sus virus (TTSuV) is common and increases with the age of growing pigs in the United States. *J Virol Methods* **2012**, *183*, 40-44, doi:10.1016/j.jviromet.2012.03.026.
9. Duvigneau, J.C.; Hartl, R.T.; Groiss, S.; Gemeiner, M. Quantitative simultaneous multiplex real-time PCR for the detection of porcine cytokines. *J Immunol Methods* **2005**, *306*, 16-27, doi:10.1016/j.jim.2005.06.021.
10. Behrendt, R.; Fiebig, U.; Norley, S.; Gurtler, L.; Kurth, R.; Denner, J. A neutralization assay for HIV-2 based on measurement of provirus integration by duplex real-time PCR. *J Virol Methods* **2009**, *159*, 40-46, doi:10.1016/j.jviromet.2009.02.024.
11. Yang, L.; Guell, M.; Niu, D.; George, H.; Lesh, E.; Grishin, D.; Aach, J.; Shrock, E.; Xu, W.; Poci, J., et al. Genome-wide inactivation of porcine endogenous retroviruses (PERVs). *Science* **2015**, *350*, 1101-1104, doi:10.1126/science.aad1191.
12. Chen, N.; Xiao, Y.; Li, X.; Li, S.; Xie, N.; Yan, X.; Li, X.; Zhu, J. Development and application of a quadruplex real-time PCR assay for differential detection of porcine circoviruses (PCV1 to PCV4) in Jiangsu province of China from 2016 to 2020. *Transbound Emerg Dis* **2021**, *68*, 1615-1624, doi:10.1111/tbed.13833.
13. McMahon, K.J.; Minihan, D.; Campion, E.M.; Loughran, S.T.; Allan, G.; McNeilly, F.; Walls, D. Infection of pigs in Ireland with lymphotropic gamma-herpesviruses and relationship to postweaning multisystemic wasting syndrome. *Vet Microbiol* **2006**, *116*, 60-68, doi:10.1016/j.vetmic.2006.03.022.
